# Supplementary material for: Multistep Approach Points to Compounds Responsible for the Biological Activity and Safety of Hydrolates from Nine Lamiaceae Medicinal Plants on Human Skin Fibroblasts
Source: MDPI journal article supplement (doi:10.3390/antiox12111988), 2023-11-09
Supplement: s1 [file s1]

## Supplementary Information

# Multistep Approach Points to Compounds Responsible for the Biological Activity and Safety of Hydrolates from Nine *Lamiaceae* Medicinal Plants on Human Skin Fibroblasts

Katarina Smiljanić <sup>1,\*</sup>, Ivana Prodić <sup>2</sup>, Sara Trifunovic <sup>3,4</sup>, Maja Krstić Ristivojević <sup>1</sup>, Milica Aćimović <sup>5</sup>, Jovana Stanković Jeremić <sup>6</sup>, Biljana Lončar <sup>7</sup> and Vele Tešević <sup>1</sup>

<sup>1</sup> University of Belgrade—Faculty of Chemistry (UBFC), Studentski Trg 12–16, 11158 Belgrade, Serbia; krstic\_maja@chem.bg.ac.rs (M.K.R.); vtsevic@chem.bg.ac.rs (V.T.)

<sup>2</sup> Institute of Virology, Vaccines and Sera “Torlak” —National Institute of the Republic of Serbia, Vojvode Stepe 458, 11152 Belgrade, Serbia; iprodic@torlak.rs

<sup>3</sup> Institute of Molecular Genetics and Genetic Engineering (IMGGE), University of Belgrade, Vojvode Stepe 444a, 11042 Belgrade, Serbia; strifunovic@imgge.bg.ac.rs

<sup>4</sup> Mediterranean Institute for Life Sciences, 21000 Split, Croatia

<sup>5</sup> Institute of Field and Vegetable Crops—National Institute of the Republic of Serbia, 21101 Novi Sad, Serbia; milica.acimovic@ifvcns.ns.ac.rs

<sup>6</sup> Institute of Chemistry, Technology and Metallurgy, National Institute of the Republic of Serbia, University of Belgrade, 11000 Belgrade, Serbia; jovanas@chem.bg.ac.rs

<sup>7</sup> Faculty of Technology Novi Sad, University of Novi Sad, 21000 Novi Sad, Serbia; cbiljana@uns.ac.rs

\* Correspondence: katarinas@chem.bg.ac.rs

Katarina Smiljanić ORCID 0000-0003-4774-8895, katicas71@gmail.com

Sara Trifunović ORCID 0000-0002-3324-8016, [strifunovic@imgge.bg.ac.rs](mailto:strifunovic@imgge.bg.ac.rs)

Maja Krstić ORCID 0000-0002-8794-9408, krstic\_maja@chem.bg.ac.rs

Ivana Prodić ORCID 0000-0003-0604-9246, [iprodic@torlak.rs](mailto:iprodic@torlak.rs)

Milica Aćimović ORCID 0000-0002-5346-1412, milica.acimovic@ifvcns.ns.ac.rs

Jovana Stanković Jeremić ORCID 0000-0003-1560-5822, jovanas@chem.bg.ac.rs

Biljana Lončar ORCID 0000-0003-2994-6871, cbiljana@uns.ac.rs

Vele Tešević ORCID 000-0001-7060-9055, vtsevic@chem.bg.ac.rs

### \*Corresponding author:

Katarina Smiljanić

Senior Research Associate

Centre of Excellence for Molecular Food Sciences and Department of Biochemistry, University of Belgrade — Faculty of Chemistry, Studentski Trg 12–16, 11158 Belgrade Serbia

Email: [katarinas@chem.bg.ac.rs](mailto:katarinas@chem.bg.ac.rs)

Phone: +381 63 220360

**Table S1:** Percentage of volatile organic compounds in hydrolates

| Hydrolate                                        | % of VOC content* |
|--------------------------------------------------|-------------------|
| (1) MP - <i>M. piperita</i>                      | 0.04 ± 0.01       |
| (2) RO - <i>R. officinalis</i>                   | 0.05 ± 0.02       |
| (3) LO - <i>L. officinalis</i>                   | 0.05 ± 0.02       |
| (4) TV - <i>T. vulgaris</i>                      | 0.11 ± 0.01       |
| (5) SS - <i>S. sclarea</i>                       | 0.04 ± 0.01       |
| (6) SM - <i>S. montana</i> ssp. <i>variegata</i> | 0.10 ± 0.02       |
| (7) LI - <i>L. intermedia</i>                    | 0.07 ± 0.02       |
| (8) OV - <i>O. vulgare</i>                       | 0.09 ± 0.03       |
| (9) MO - <i>M. officinalis</i>                   | 0.06 ± 0.01       |

\*Values represent average value of triplicates ± SD.

**Table S2.** Correlation matrix for antioxidative properties by DPPH and ABTS+ test and total phenolic content of nine hydrolates

| Correlation<br>Pearson r | DPPH  | ABTS+ | TPC   | Correlation<br>P values | DPPH    | ABTS+  | TPC    |
|--------------------------|-------|-------|-------|-------------------------|---------|--------|--------|
| DPPH                     |       | 0.927 | 0.960 | DPPH                    | 0.0003  | 0.0003 | 0.0004 |
| ABTS+                    | 0.927 |       | 0.952 | ABTS+                   |         |        | 0.0007 |
| TPC                      | 0.960 | 0.952 |       | TPC                     | 0.00004 | 0.0001 |        |

Legend: r – Pearson correlation coefficient; ABTS+ - antioxidative test; DPPH - 2,2-diphenyl-1-picrylhydrazyl antioxidative test; TPC – total phenolic content determination.

**Table S3.** Protein and peptide concentration determination via micro and macro method of bicinchoninic acid (BCA) assay

| Method | Standard curve<br>with bovine<br>serum albumin as<br>standard (mg/mL) | Sample/Hydrolate               | SpeedVac<br>concentrated<br>hydrolates samples<br>(Fig. 1)<br>(mg/mL) | TCA/acetone<br>precipitated samples<br>(Fig. S2)<br>(mg/mL) |
|--------|-----------------------------------------------------------------------|--------------------------------|-----------------------------------------------------------------------|-------------------------------------------------------------|
|        | Blank (zero)                                                          | MP - <i>M. piperita</i>        | as blank                                                              | as blank                                                    |
| micro  | 0.0025                                                                | RO - <i>R. officinalis</i>     | as blank                                                              | as blank                                                    |
|        | 0.005                                                                 | LO - <i>L. officinalis</i>     | as blank                                                              | as blank                                                    |
|        | 0.01                                                                  | TV - <i>T. vulgaris</i>        | as blank                                                              | as blank                                                    |
|        | 0.02                                                                  | SS - <i>S. sclarea</i>         | as blank                                                              | as blank                                                    |
| macro  | 0.04                                                                  | SM - <i>S. montana</i> ssp     | as blank                                                              | as blank                                                    |
|        | 0.08                                                                  | LI - <i>L. intermedia</i>      | as blank                                                              | as blank                                                    |
|        | 1.20                                                                  | OV - <i>O. vulgare</i>         | as blank                                                              | as blank                                                    |
|        | 1.60                                                                  | MO - <i>M. officinalis</i>     | as blank                                                              | as blank                                                    |
|        |                                                                       | Ambrosia extract 2x<br>diluted | N/A                                                                   | 1.25                                                        |

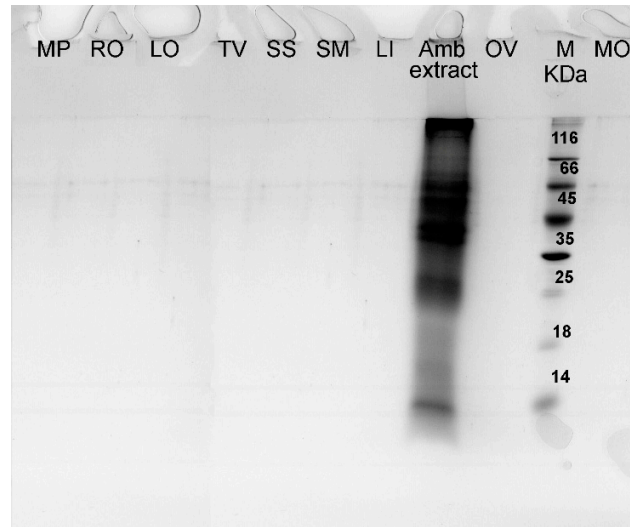

**Figure S1.** Polyacrylamide gel with samples obtained by TCA/acetone protein precipitation method from nine hydrolates. Electrophoretically resolved sodium dodecyl sulphate polyacrylamide gel (16%), with 10 mL of hydrolates precipitated with 40 mL 13% TCA/acetone overnight at -20 °C vacuum) per protocol described by Sheoran et al. [48]. Tentative pellet was mixed with 20 µL of 1 × Laemmli buffer in denaturing conditions, stained with CBB 250-R. Protein markers were the quantitative type of control, while protein extract obtained in house from the *Ambrosia artemissfolia* pollen, was used as a positive protein control (10 µL of 2,5 mg/mL). *M. piperita* (MP), *R. officinalis* (RO), *L. officinalis* (LO), *T. vulgaris* (TV), *S. sclarea* (SS), *S. montana* ssp. *variegata* (SM), *L. intermedia* (LI), *O. vulgare* (OV) and *M. officinalis* (MO), M – protein weight markers in kilo Daltons (kDa).

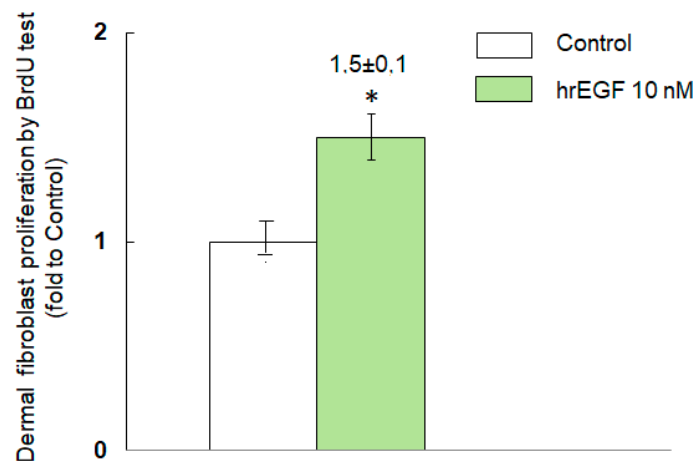

**Figure S2.** Proliferation of primary human dermal fibroblasts treated with 10 nM recombinant human epidermal growth factor (hrEGF) during 48 h, assessed through DNA synthesis via BrdU testing. \*denotes significantly different proliferation at  $p < 0.05$ , compared to the control group.

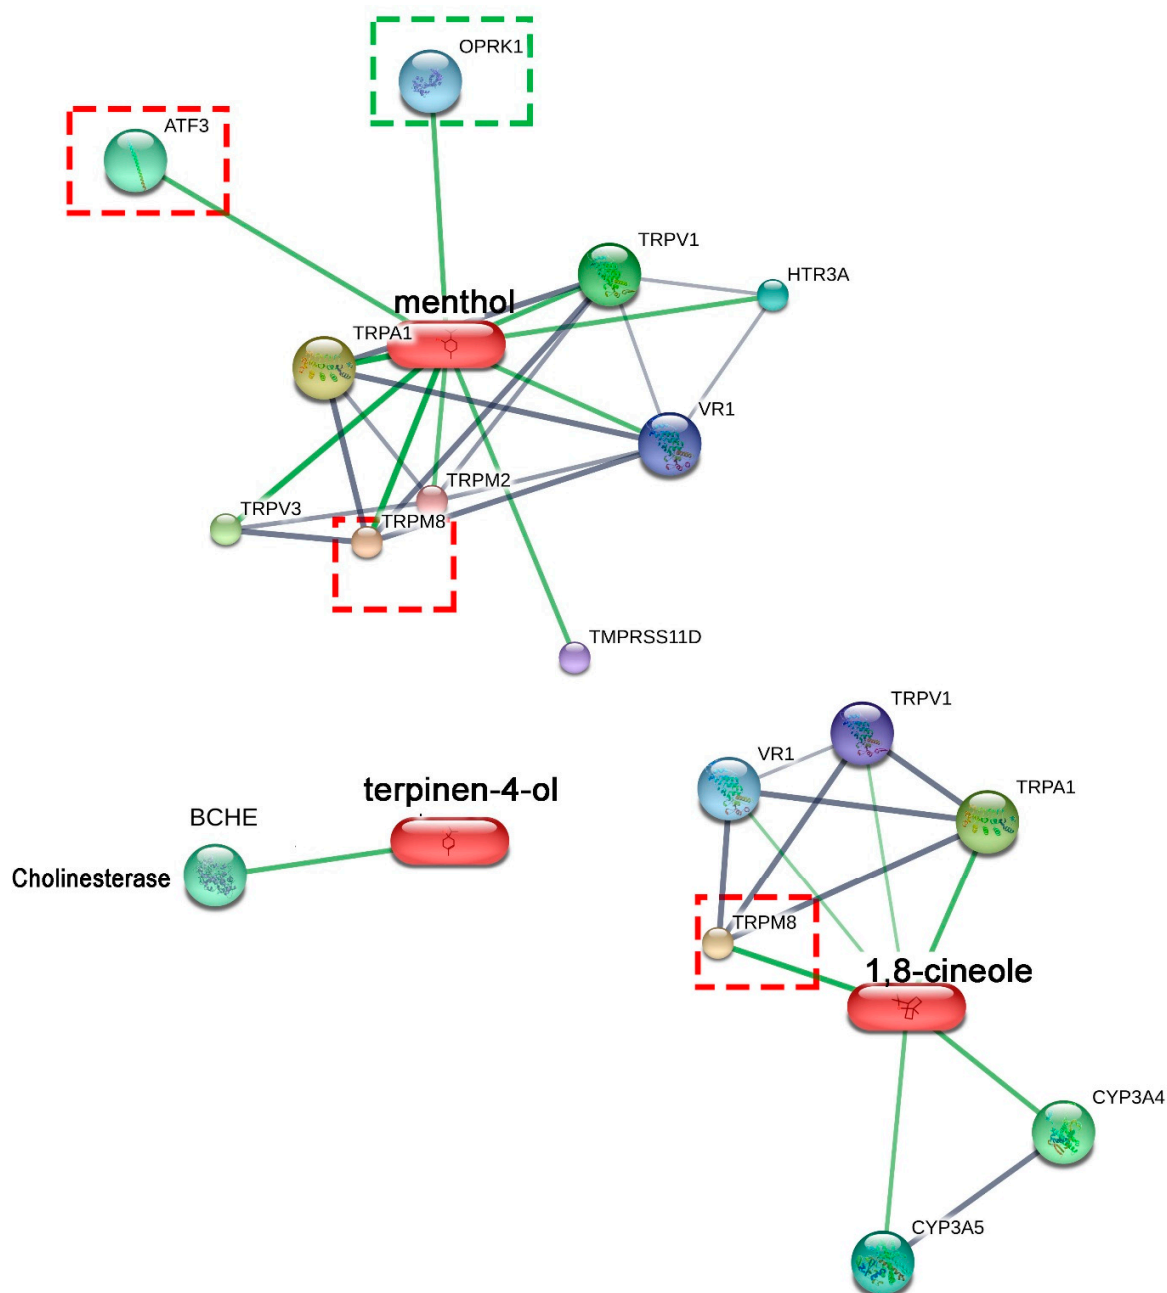

**Figure S3.** The confidence view of protein networking of menthol, terpinene-4-ol and 1,8-cineole (representatives of the major VOC from hydrolates that exert negative viability effect), done by STITCH database <http://stitch.embl.de/>. Only first-line protein targets of chemical compounds are shown with the host species of *Homo sapiens*.

## References

Sheoran, I.; Ross, A.; Olson, D.; Sawhney, V. Compatibility of plant protein extraction methods with mass spectrometry for proteome analysis. *Plant Science* **2009**, *176*, 99-104, doi:10.1016/j.plantsci.2008.09.015.
